# Supplementary material
Source: Springer Nature journal article supplement (https://www.springermedizin.de/resource/supplementary/12943_2013_1264_MOESM1_ESM.pdf/9553116)

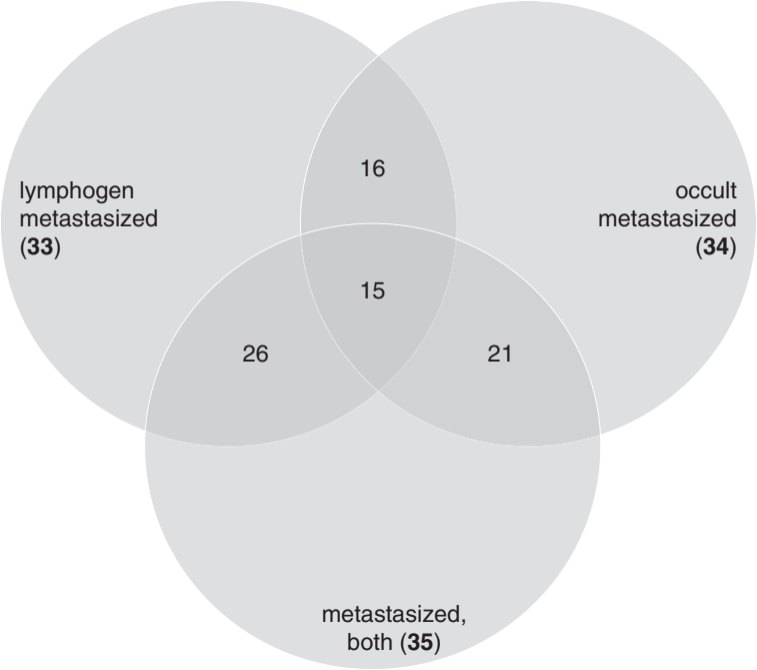

lymphogen  
metastasized  
**(33)**

occult  
metastasized  
**(34)**

16

15

26

21

metastasized,  
both **(35)**

Supplement: MOESM1 [file 9553116]
